# Supplementary material for: Optical properties of pyridine adsorbed polycyclic aromatic hydrocarbons using quantum chemical calculations
Source: Royal Society of Chemistry journal article supplement (doi:10.1039/c8cp06744a), 2018-12-10
Supplement: c8cp06744a1.pdf [file c8cp06744a1.pdf]

## **Supplementary Information**

### **Optical Properties of Pyridine Adsorbed Polycyclic Aromatic Hydrocarbons using Quantum Chemical Calculations**

Junais Habeeb Mekkath\*

[j.mekkath@kcst.edu.kw](mailto:j.mekkath@kcst.edu.kw)

Department of Physics, Kuwait College of Science And Technology, Doha Area, 7th Ring Road, P.O.  
Box 27235, Kuwait.

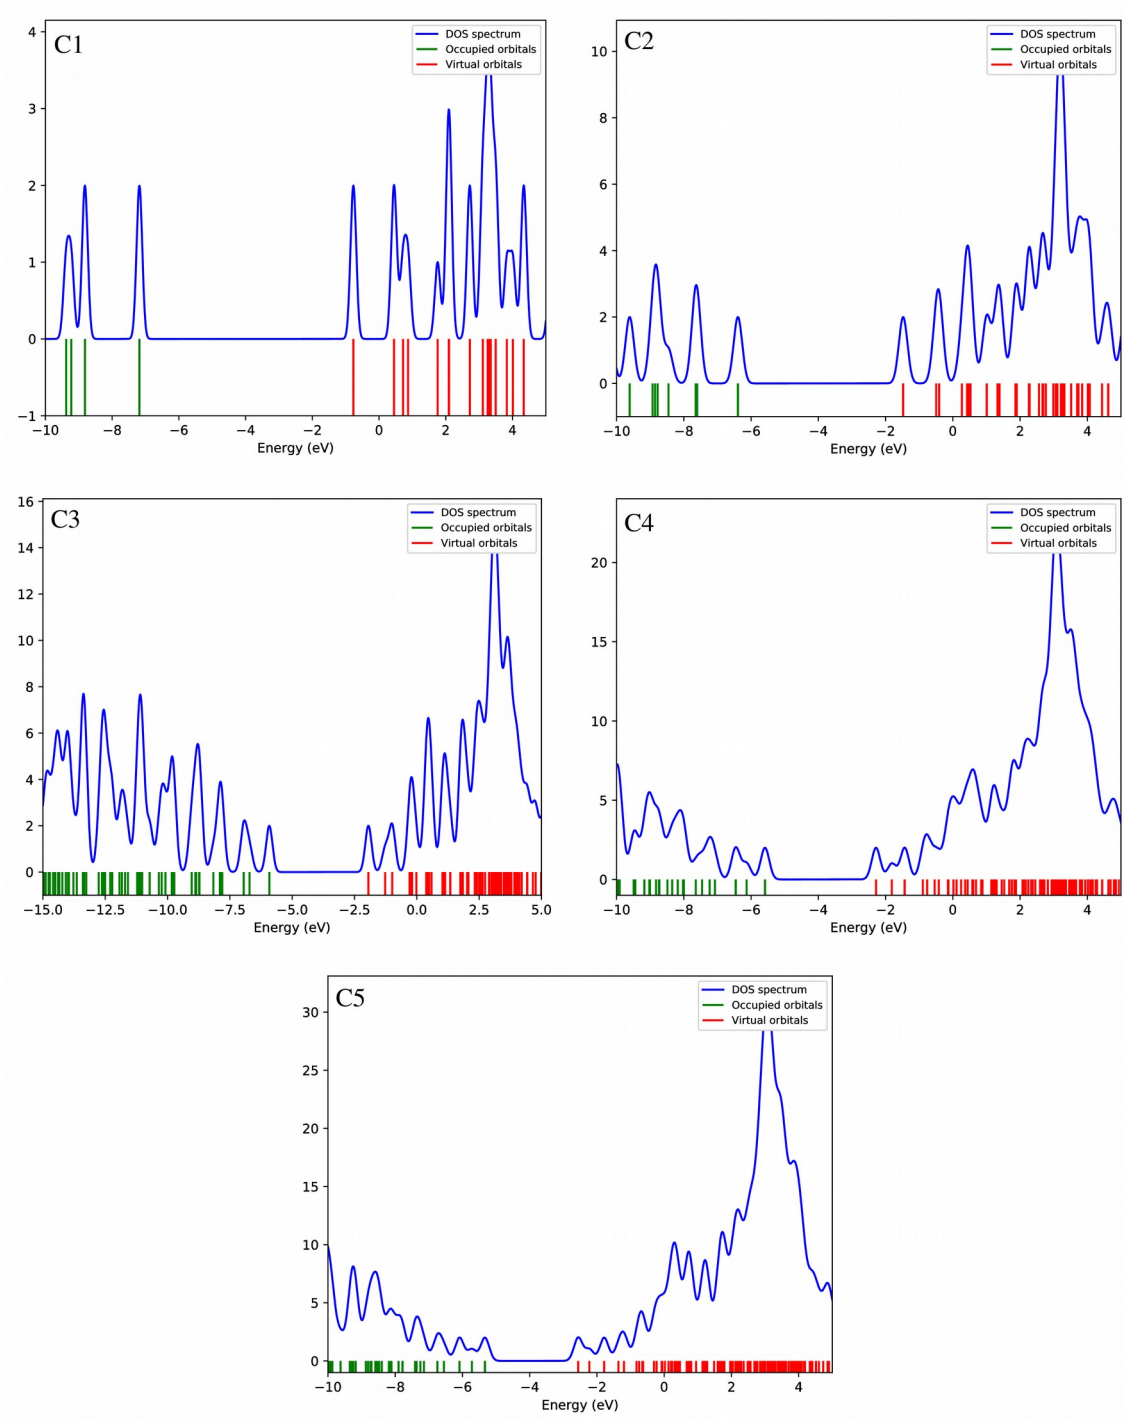

Figure S1: density of states of C1, C2, C3, C4, and C5 structures.

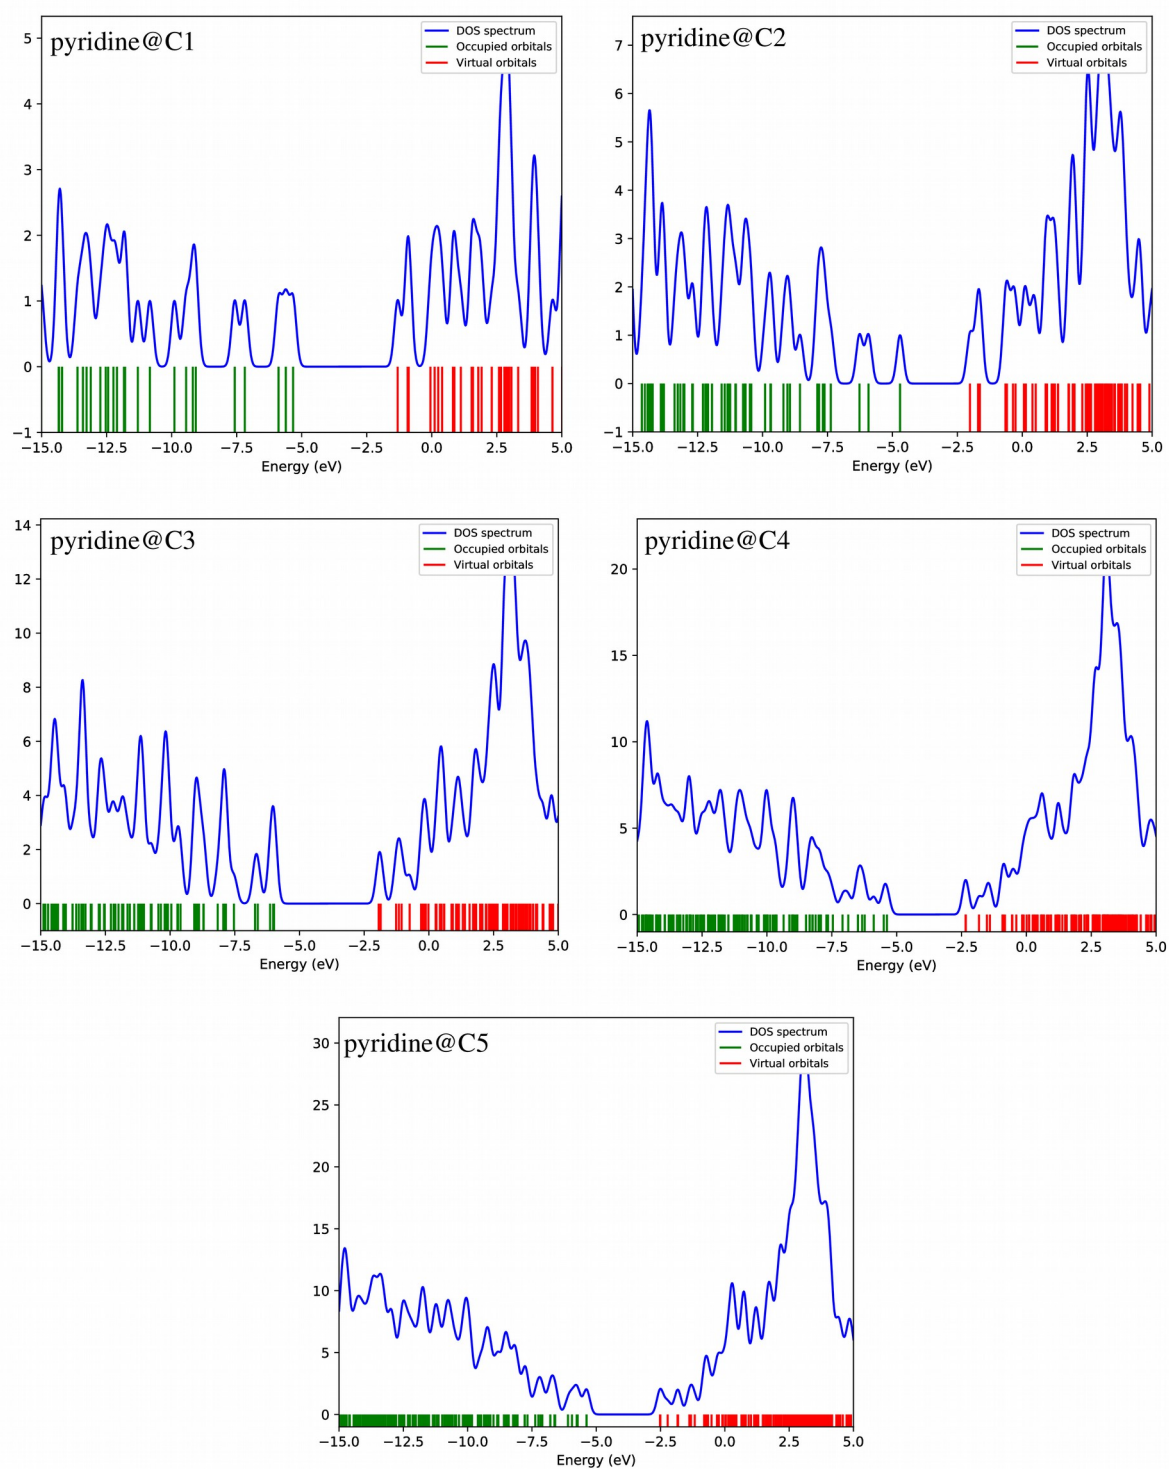

Figure S2: density of states of pyridine@C1, pyridine@C2, pyridine@C3, pyridine@C4, and pyridine@C5 structures.

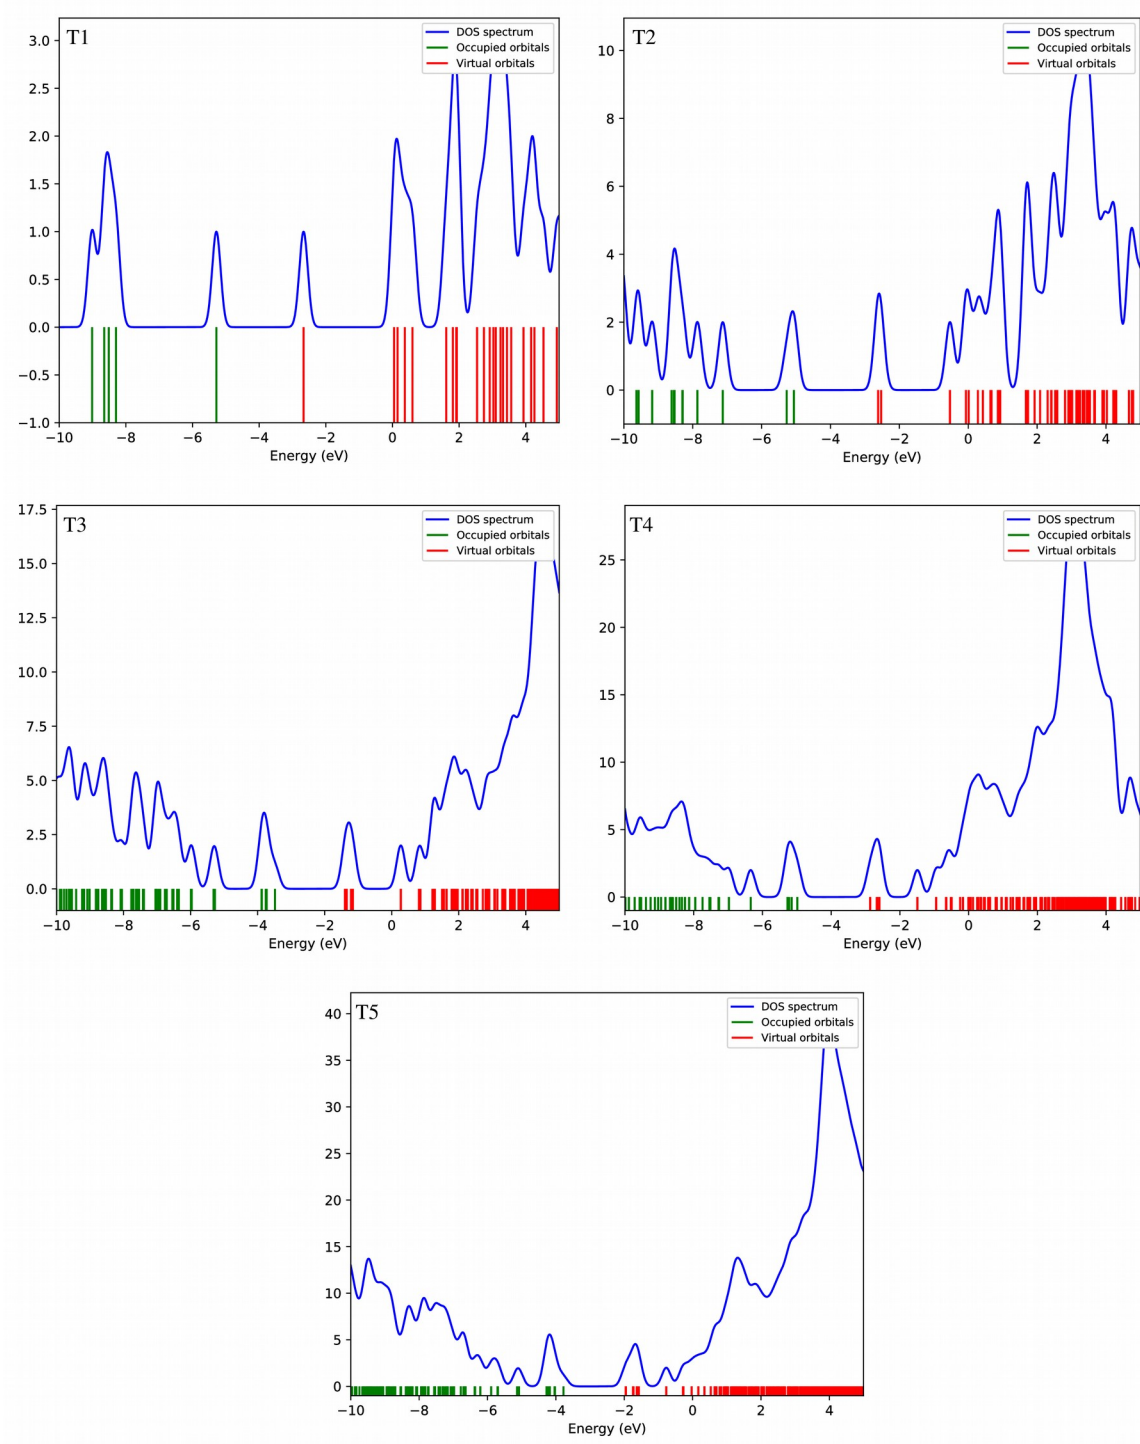

Figure S3: density of states of T1, T2, T3, T4, and T5 structures.

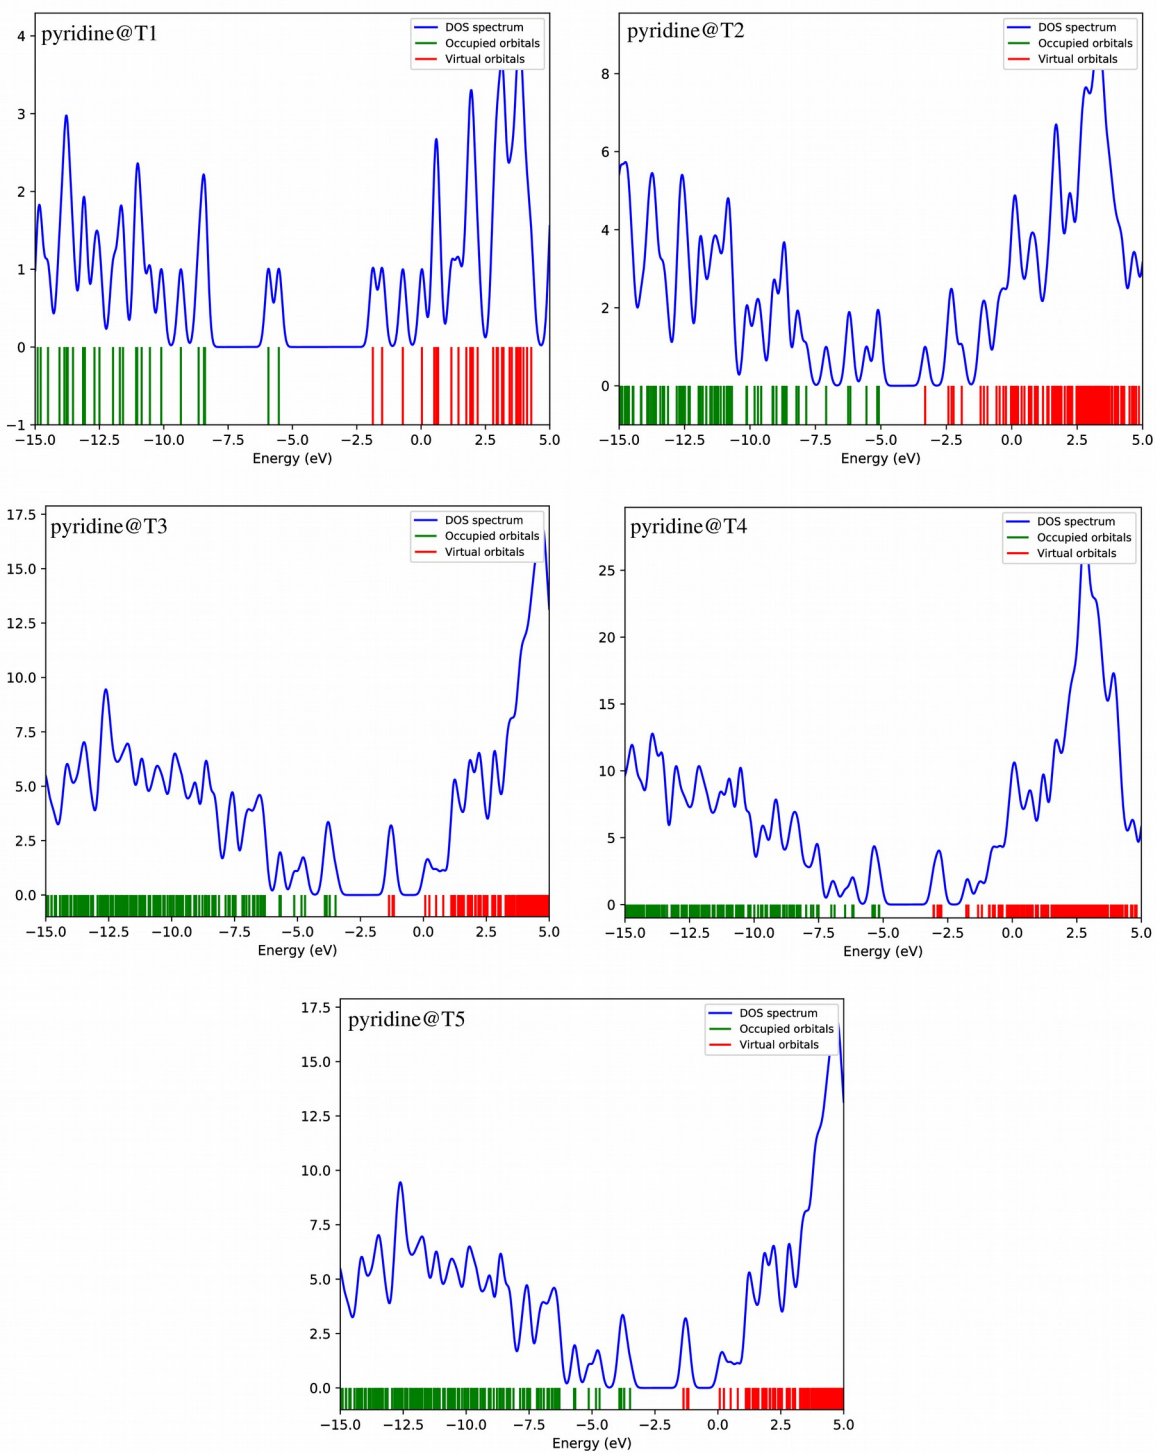

Figure S4: density of states of pyridine@T1, pyridine@T2, pyridine@T3, pyridine@T4, and pyridine@T5 structures.
